# Supplementary material for: IL-33 Inhibits TNF-α-Induced Osteoclastogenesis and Bone Resorption
Source: PubMed Central journal article supplement (PMC7038169; doi:10.3390/ijms21031130), 2020-02-08
Supplement: ijms-21-01130-s001.pdf [file ijms-21-01130-s001.pdf]

**Supplementary Materials:**

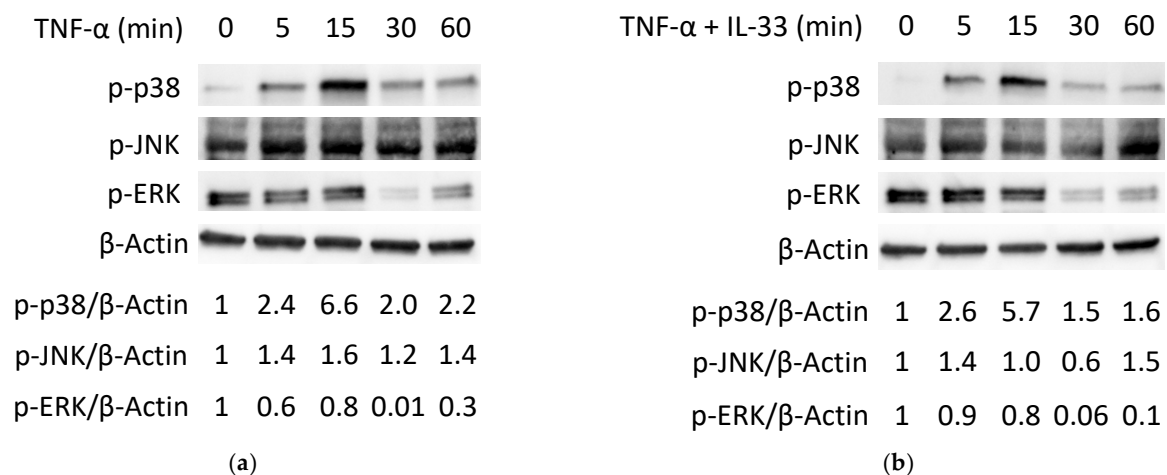

**Figure S1.** IL-33 did not affect MAPK phosphorylation by TNF- $\alpha$ . Osteoclast precursors were exposed to (a) TNF- $\alpha$  or (b) TNF- $\alpha$  + IL-33 for specific periods. Cells were lysed and contents analyzed by western blotting.
